# Supplementary material for: Optimal Use of Novel Immunotherapeutics in B-Cell Precursor ALL
Source: MDPI journal article supplement (doi:10.3390/cancers15041349), 2023-02-20
Supplement: s1 [file s1]

**Table S1. Recent and ongoing studies exploring immunotherapies in the frontline treatment of B-ALL patients**

| Trial number                      | Cooperative Group         | Phase     | Planned N of pts | Age   | Treatment                                                      | Position of the immunotherapy                                                                                                                                                                                                       | Ref./DOI |
|-----------------------------------|---------------------------|-----------|------------------|-------|----------------------------------------------------------------|-------------------------------------------------------------------------------------------------------------------------------------------------------------------------------------------------------------------------------------|----------|
| <b>B-ALL Ph negative</b>          |                           |           |                  |       |                                                                |                                                                                                                                                                                                                                     |          |
| NCT02877303<br>(NCI-2017-00596)   | M.D. Anderson             | Phase II  | 80               | 14-59 | ChT plus blinatumomab (+/- inotuzumab)                         | > Blinatumomab plus InO (day 5, 11 on even cycles) for up to 4 cycles after induction ChT;<br>> Maintenance: Blinatumomab alternating with ChT                                                                                      | [1]      |
| NCT03150693<br>(Alliance A041501) | Alliance<br>(Dana-Farber) | Phase III | 310              | 18-39 | Frontline ChT (Arm 1) vs Frontline ChT plus inotuzumab (Arm 2) | Inotuzumab for two cycles after remission induction treatment, before consolidation ChT                                                                                                                                             |          |
| NCT03367299<br>(GIEMEMA LAL2317)  | GIEMEMA                   | Phase II  | 149              | 18-65 | ChT plus blinatumomab                                          | Blinatumomab after high-dose consolidation cycles (cycle 3 and 6)                                                                                                                                                                   | [2]      |
| NCT03541083<br>(HOVON146ALL)      | HOVON                     | Phase II  | 80               | 18-70 | Blinatumomab plus ChT                                          | > Prephase: blinatumomab plus steroid;<br>> Blinatumomab after consolidation and after late intensification therapy, before maintenance or alloHSCT.                                                                                |          |
| NCT02003222<br>(ECOG-E1910)       | ECOG-ACRIN                | Phase III | 488              | 30-70 | Frontline ChT vs Frontline ChT plus blinatumomab               | > Blinatumomab after first intensification cycle and after Cycle 3 of consolidation;<br>> Blinatumomab before maintenance treatment                                                                                                 | [3]      |
| NCT03249870<br>(EWALL-INO)        | EWALL                     | Phase II  | 130              | >55   | Fractionated inotuzumab plus dose-reduced ChT                  | > Induction part I: reduced-intensity ChT plus 3 injections of inotuzumab (0.8 mg/mq day 1; 0.5 mg/mq day 8 and 15)<br>> Induction part II (pts in CR/CRp or salvage treatment): ChT plus 2 injections of InO 0.5 mg/mq (day 1, 15) | [4]      |

|                                   |               |            |     |       |                                                                |                                                                                                                                                                                                                                |     |
|-----------------------------------|---------------|------------|-----|-------|----------------------------------------------------------------|--------------------------------------------------------------------------------------------------------------------------------------------------------------------------------------------------------------------------------|-----|
| NCT03480438<br>(EWALL-BOLD)       | EWALL-GMALL   | Phase II   | 50  | 56-74 | Blinatumomab plus dose-reduced ChT                             | > induction: 1 cycle of blinatumomab after ChT. Same scheme is repeated in patients failing Induction I.<br>> Consolidation: ChT alternating with Blinatumomab for a total of 6 cycles (3 ChT and 3 infusions of blinatumomab) | [5] |
| NCT03460522<br>(INITIAL-1)        | GMALL         | Phase II   | 45  | 56-74 | Inotuzumab plus ChT                                            | Inotuzumab 1.8 mg as induction, followed by consolidation with 2 cycles with InO 1.5 mg plus conventional ChT                                                                                                                  | [6] |
| NCT01371630<br>(NCI-2011-01123)   | M.D. Anderson | Phase I/II | 276 | ≥60   | Inotuzumab (+/- blinatumomab) plus mini-Hyper-CVD              | > Induction: reduced-intensity ChT followed by fractionated inotuzumab for four cycles,<br>> Consolidation: 4 cycles of Blinatumomab<br>> Maintenance: blinatumomab alternating with ChT                                       | [7] |
| NCT03739814<br>(Alliance A041703) | Alliance      | Phase II   | 64  | ≥60   | Inotuzumab plus Blinatumomab                                   | > Induction: inotuzumab (21-day course) up to 2 cycles<br>> Consolidation: blinatumomab (84-days course) up to 2 cycles                                                                                                        |     |
| NCT02143414<br>(SWOG 1318)        | SWOG          | Phase II   | 58  | > 65  | Blinatumomab plus maintenance                                  | > Induction: blinatumomab up to 2 cycles.<br>> Consolidation: blinatumomab for 3 cycles                                                                                                                                        | [8] |
| <b>B-ALL Ph positive</b>          |               |            |     |       |                                                                |                                                                                                                                                                                                                                |     |
| NCT02744768<br>(D-ALBA)           | GIMEMA        | Phase II   | 60  | ≥18   | Dasatinib plus blinatumomab                                    | blinatumomab plus TKI as consolidation for up to 5 cycles, after a 84-day induction with TKI plus steroid                                                                                                                      | [9] |
| NCT04722848<br>(GIMEMA ALL2820)   | GIMEMA        | Phase III  | 236 | ≥18   | Ponatinib plus blinatumomab vs Imatinib plus CT                | Consolidation with blinatumomab up to 5 cycles after a 70-day chemo-free induction with TKI plus steroid                                                                                                                       |     |
| NCT04530565<br>(EA9181)           | ECOG-ACRIN    | Phase III  | 330 | 18-75 | TKI (dasatinib or ponatinib) plus ChT vs TKI plus blinatumomab | Blinatumomab is associated with TKI for 2 cycles in a chemo-free induction treatment after a short pre-phase with steroid and TKI.                                                                                             |     |

|                                 |               |          |     |     |                                                                                                            |                                                                                                                                  |      |
|---------------------------------|---------------|----------|-----|-----|------------------------------------------------------------------------------------------------------------|----------------------------------------------------------------------------------------------------------------------------------|------|
| NCT03147612<br>(NCI-2018-01186) | M.D. Anderson | Phase II | 60  | >18 | Ponatinib plus blinatumomab and low-intensity ChT                                                          | Blinatumomab for 4 cycles as consolidation treatments after an induction treatment based on TKI plus reduced-intensity ChT.      |      |
| NCT03263572<br>(NCI-2018-01078) | M.D. Anderson | Phase II | 60  | >18 | Ponatinib plus blinatumomab                                                                                | Blinatumomab is administered as induction therapy up to 5 cycles in association with TKI. TKI is continued for at least 5 years. | [10] |
| NCT04688983<br>(EWALL-Ph-03)    | EWALL         | Phase II | 180 | ≥55 | Arm1: ponatinib plus standard ChT<br>Arm2: imatinib plus standard ChT<br>Arm3: ponatinib plus blinatumomab | In the experimental arm, TKI is given continuously in association with blinatumomab.                                             |      |

ChT: chemotherapy; TKI: tyrosine kinase inhibitor

**Table S2. Novel approaches in relapse/refractory B-ALL patients**

| Trial number                      | Cooperative Group                             | Phase | Planned N of pts | Age | Treatment                                                                 | Study overview                                                                                                                                                                                                                                                                                                  | Ref. |
|-----------------------------------|-----------------------------------------------|-------|------------------|-----|---------------------------------------------------------------------------|-----------------------------------------------------------------------------------------------------------------------------------------------------------------------------------------------------------------------------------------------------------------------------------------------------------------|------|
| Check-point inhibitors            |                                               |       |                  |     |                                                                           |                                                                                                                                                                                                                                                                                                                 |      |
| NCT04546399<br>(AALL1821)         | NCI                                           | II    | 550              | ≤30 | Blinatumomab plus nivolumab                                               | A Pre-phase treatment is given to patients with EM relapses or hyperleukocytosis, and re-induction is dispensed to young patients or those with late or EM relapses. Patients are then randomized to receive blinatumomab with or without nivolumab (on day 11, 25 of C1; on day 1, 15 of C2) up to two cycles. |      |
| NCT03160079<br>(161287/UCHMC1504) | Single center<br>(UCHMC)                      | I/II  | 24               | ≥18 | Blinatumomab plus pembrolizumab                                           | Blinatumomab is administered in association with Pembrolizumab i.v. given on day 15 and 36 of a 42-day cycles for two cycles. Then, patients in CR/CRh continue for a total of 5 cycles.                                                                                                                        | [11] |
| NCT03512405<br>(NCI-2018-00526)   | Single center<br>(City of Hope)               | I/II  | 36               | ≥18 | Blinatumomab plus pembrolizumab                                           | Patients receive blinatumomab plus pembrolizumab infused on day 15 or 22 in cycle 1, then on day 1 and 22 of a 42-day cycle. Up to 5 cycles are permitted. Patients in CR could receive a maintenance treatment with Blinatumomab for up to 4 cycles.                                                           | [12] |
| NCT02879695<br>(NCI-2016-01300)   | NCI                                           | I     | 30               | ≥16 | Blinatumomab plus nivolumab or blinatumomab plus nivolumab and ipilimumab | Blinatumomab is given in association with nivolumab i.v. on day 11 and then every two weeks of a 42-cycle for one year. In a group of patients, Ipilimumab is added in day 11 every 6 weeks for one year.                                                                                                       | [13] |
| CAR constructs                    |                                               |       |                  |     |                                                                           |                                                                                                                                                                                                                                                                                                                 |      |
| NCT03241940                       | Academic,<br><br>Lucile Packard<br>Children's | I     | 50               | ≤30 | Autologous CD19/CD22 CAR-T                                                | Dose escalation study of a dual antigen CD19/CD22-CAR-T cell product. Cells are infused after lymphodepletion with Flu-CY. Four different cell doses are explored.                                                                                                                                              |      |

|                                 |                                                  |      |    |      |                                                                                  |                                                                                                                                                                                                                                                                                                                                 |      |
|---------------------------------|--------------------------------------------------|------|----|------|----------------------------------------------------------------------------------|---------------------------------------------------------------------------------------------------------------------------------------------------------------------------------------------------------------------------------------------------------------------------------------------------------------------------------|------|
|                                 | Hospital,<br>Stanford<br>University              |      |    |      |                                                                                  |                                                                                                                                                                                                                                                                                                                                 |      |
| NCT03330691<br>(PLAT-05)        | Academic,<br>Seattle<br>Children's<br>Hospital   | I    | 80 | ≤30  | SCRI-CAR19x22v1<br>and<br><br>SCRI-CAR19x22v2<br>(Autologous<br>CD19/CD22 CAR-T) |                                                                                                                                                                                                                                                                                                                                 | [14] |
| NCT03448393<br>(18-C-0059)      | NCI                                              | I    | 87 | 3-39 | CD19.22.BBz<br>(Autologous<br>CD19/CD22 CAR-T)                                   | Transduced autologous T cells express a bivalent CD19/CD22 CAR. In order to optimize CAR-T cell expansion and persistence, a bicistronic CD19/CD22 CAR construct is further explored.                                                                                                                                           | [15] |
| NCT04029038<br>(NCI-2019-04229) | M.D.<br>Anderson                                 | I/II | 30 | ≤70  | Autologous<br>CD19/CD22 CAR-T                                                    | Patients receive a standard lymphodepleting therapy based on Flu-CY followed by the infusion of CD19-CD22 CAR-T cell product. Patients relapsing after the protocol assessment could receive a second infusion of engineered cells.                                                                                             |      |
| NCT03289455<br>(AMELIA)         | Industry                                         | I/II | 23 | <25  | AUTO3 (CD19/22<br>CAR-T)                                                         | AUTO3 is an autologous CAR-T cell product expressing humanized bicistronic anti-CD19/CD22 CAR. The CAR construct incorporates the TNFR costimulatory domain.                                                                                                                                                                    | [16] |
| NCT03620058                     | Academic,<br>University of<br>Pennsylvania       | I    | 23 | ≥18  | CART22-65s plus<br>huCART19                                                      | CART22-65s and huCART19 are two humanized autologous CAR-T cell products explored in patients with R/R B-ALL. Two million cells/kg per cell product are infused after Flu-CY lymphodepletion.                                                                                                                                   | [17] |
| NCT03825718                     | Academic,<br>Hebei Yanda<br>Ludaopei<br>Hospital | I    | 25 | 3-44 | CD19 Fast-CAR-T<br>(F-CAR-T)                                                     | CD19 F-CAR-T are cells frozen few hours after the viral transduction to allow the CAR-T cell expansion in vivo after infusion back into the patient. Reducing the duration of ex vivo culture should limit the differentiation of T cells, favoring the preservation of naïve and stem cell memory T cells in the final product | [18] |

|                               |                                                                                       |      |     |       |                                                                |                                                                                                                                                                                                                                                                                                                |         |
|-------------------------------|---------------------------------------------------------------------------------------|------|-----|-------|----------------------------------------------------------------|----------------------------------------------------------------------------------------------------------------------------------------------------------------------------------------------------------------------------------------------------------------------------------------------------------------|---------|
| NCT02746952<br>(CALM)         | Industry                                                                              | I    | 25  | 16-69 | UCART19<br>(allogeneic<br>engineered anti-19<br>CAR-T)         | Donor-derived allogeneic anti-CD19 CAR-T cells are engineered with TALENs nucleases disrupting TCR alpha chain (TRAC) and CD52 genes, reducing the risk of GvHD and acquiring resistance to lymphodepleting drugs. The product is infused after a lymphodepleting regimen containing Flu-CY and alemtuzumab.   | [19]    |
| NCT04150497<br>(BALLI-01)     | Industry                                                                              | I    | 30  | 15-70 | UCART22<br>(allogeneic<br>engineered anti-22<br>CAR-T)         | Allogeneic lymphocytes are transduced with lentivector expressing anti-22 CAR construct. TRAC and CD52 genes are disrupted using TALENs. In order to increase CAR-T expansion, alemtuzumab is added to lymphodepletion with Flu-CY.                                                                            | [20]    |
| NCT03666000<br>(PBCAR0191-01) | Industry                                                                              | I/II | 120 | ≥18   | PBCAR0191<br>(allogeneic<br>engineered anti-19<br>CAR-T)       | The CD-19 CAR is inserted in the TRAC locus of donor-derived T cells using a TRAC-specific ARCUS nuclease, disrupting the endogenous TCR and preventing GvHD. A standard (SL) or enhanced lymphodepleting chemotherapy (i.e. Flu 30 mg x4 days and Cy 1000 mg x3 days) is investigated.                        | [21]    |
| NCT03389035<br>(FT01CARCIK)   | Academic<br>Fondazione<br>MBBM<br>Monza and<br>ASST Papa<br>Giovanni XXIII<br>Bergamo | I/II | 21  | 1-75  | CARCIK-CD19<br>(anti-CD19<br>Cytokine-induced<br>killer cells) | Donor-derived, in vitro differentiated CIK cells engineered using a non-viral Sleeping Beauty transposon system which induces the expression of an anti-CD19 CAR construct. Infused in patients R/R after alloHSCT, donor-derived CARCIK-CD19 overcome the HLA barrier, potentially reducing the risk of GvHD. | [22,23] |
| NCT05252403<br>(FT03CARCIK)   | Academic<br>Fondazione<br>MBBM<br>Monza and<br>ASST Papa<br>Giovanni XXIII<br>Bergamo | II   | 33  | 1-75  | CARCIK-CD19<br>(anti-CD19<br>Cytokine-induced<br>killer cells) | To determine the activity and the safety of a therapeutic strategy that allows a second<br><br>CARCIK-CD19 cells infusion, driven by the status of disease from one month after the first infusion, in adult and pediatric patients with r/r BCPALL.                                                           |         |

CAR: Chimeric Antigen Receptor; EM: Extramedullary; Flu-Cy: Fludarabine-Cyclophosphamide; Flu: fludarabine; Cy: cyclophosphamide; GvHD: Graft vs Host Disease; TCR: T Cell Receptor; i.v.: intravenous

## References

1. Short, N.J.; Kantarjian, H.M.; Ravandi, F.; Huang, X.; Ferrajoli, A.; Kadia, T.M.; Thompson, P.A.; Alvarado, Y.; Jain, N.; Yilmaz, M.; et al. Hyper-CVAD and Sequential Blinatumomab in Adults with Newly Diagnosed Philadelphia Chromosome-Negative B-Cell Acute Lymphoblastic Leukemia: Results from a Phase II Study. *Blood* **2020**, *136*, 9–11, <https://doi.org/10.1182/blood-2020-138565>.
2. Bassan, R.; Chiaretti, S.; Starza, I.D.; Spinelli, O.; Santoro, A.; Elia, L.; Vitale, A.; Taherinasab, A.; Piccini, M.; Ferrara, F.; et al. Preliminary Results of the GIMEMA LAL2317 Sequential Chemotherapy-Blinatumomab Front-Line Trial for Newly Diagnosed Adult PH-Negative B-Lineage ALL Patients. *EHA Libr.* **2021**, *5*, S114.
3. Litzow, M.R.; Sun, Z.; Paietta, E.; Mattison, R.J.; Lazarus, H.M.; Rowe, J.M.; Arber, D.A.; Mullighan, C.G.; Willman, C.L.; Zhang, Y.; et al. Consolidation Therapy with Blinatumomab Improves Overall Survival in Newly Diagnosed Adult Patients with B-Lineage Acute Lymphoblastic Leukemia in Measurable Residual Disease Negative Remission: Results from the ECOG-ACRIN E1910 Randomized Phase 3 Nationa. *Blood* **2022**, *140*, LBA-1.
4. Chevallier, P.; Leguay, T.; Doubek, M.; Huguet, F.; Salek, C.; Cabannes, A.; Wartiovaara-Kautto, U.; Saillard, C.; Raffoux, E.; Cluzeau, T.; et al. Fractionated Inotuzumab Ozogamicin Combined with Low-Intensity Chemotherapy Provides Very Good Outcome in Older Patients with Newly Diagnosed CD22+ Philadelphia Chromosome-Negative B-Cell Precursor Acute Lymphoblastic Leukemia: First Results from the EWALL-INO Study. *Blood* **2021**, *138*, 511–511, <https://doi.org/10.1182/blood-2021-148625>.
5. EHA Library. Gökbuget N. 06/12/2020; 294333; EP414
6. Stelljes, M.; Raffel, S.; Wäsch, R.; Scholl, S.; Kondakci, M.; Rank, A.; Haenel, M.; Martin, S.; Schwab, K.; Knaden, J.; et al. First Results of an Open Label Phase II Study to Evaluate the Efficacy and Safety of Inotuzumab Ozogamicin for Induction Therapy Followed By a Conventional Chemotherapy Based Consolidation and Maintenance Therapy in Patients Aged 56 Years and Older with AAcute Lymphoblastic Leukemia (INITIAL-1 trial). *Blood* **2020**, *136*, 12–13. <https://doi.org/10.1182/blood-2020-136920>.
7. Short, N.J.; Kantarjian, H.; Ravandi, F.; Huang, X.; Jain, N.; Kadia, T.M.; Khoury, J.D.; Jorgensen, J.L.; A Wang, S.; Alvarado, Y.; et al. Updated Results from a Phase II Study of Mini-Hyper-CVD Plus Inotuzumab Ozogamicin, with or without Blinatumomab, in Older Adults with Newly Diagnosed Philadelphia Chromosome-Negative B-Cell Acute Lymphoblastic Leukemia. *Blood* **2021**, *138*, 3400–3400, <https://doi.org/10.1182/blood-2021-154074>.
8. Advani, A.S.; Moseley, A.; O'Dwyer, K.M.; Wood, B.L.; Fang, M.; Wieduwilt, M.J.; Aldoss, I.; Park, J.H.; Klisovic, R.B.; Baer, M.R.; et al. SWOG 1318: A Phase II Trial of Blinatumomab Followed by POMP Maintenance in Older Patients With Newly Diagnosed Philadelphia Chromosome-Negative B-Cell Acute Lymphoblastic Leukemia. *J. Clin. Oncol. Off. J. Am. Soc. Clin. Oncol.* **2022**, *40*, 1574–1582. <https://doi.org/10.1200/JCO.21.01766>.
9. Foà, R.; Bassan, R.; Vitale, A.; Elia, L.; Piciocchi, A.; Puzzolo, M.-C.; Canichella, M.; Viero, P.; Ferrara, F.; Lunghi, M.; et al. Dasatinib–Blinatumomab for Ph-Positive Acute Lymphoblastic Leukemia in Adults. *N. Engl. J. Med.* **2020**, *383*, 1613–1623. <https://doi.org/10.1056/NEJMoa2016272>.
10. Short, N.J.; Kantarjian, H.M.; Konopleva, M.; Jain, N.; Huang, X.; Ravandi, F.; Wierda, W.G.; Borthakur, G.; Sasaki, K.; Issa, G.C.; et al. Combination of ponatinib and blinatumomab in Philadelphia chromosome-positive acute lymphoblastic leukemia: Early results from a phase II study.. *J. Clin. Oncol.* **2021**, *39*, 7001–7001, [https://doi.org/10.1200/jco.2021.39.15\\_suppl.7001](https://doi.org/10.1200/jco.2021.39.15_suppl.7001).
11. Schwartz, M.; Damon, L.E.; Jeyakumar, D.; Costello, C.L.; Tzachanis, D.; Schiller, G.J.; Reiner, J.; Wieduwilt, M.J. Blinatumomab in Combination with Pembrolizumab Is Safe for Adults with Relapsed or Refractory B-Lineage Acute Lymphoblastic Leukemia: University of California Hematologic Malignancies Consortium Study 1504. *Blood* **2019**, *134*, 3880. <https://doi.org/10.1182/blood-2019-131061>.
12. Sandhu, K.S.; Huynh-Tran, Q.; Cooper, E.E.; Zhang, J.; Palmer, J.; Tsai, N.-C.; Thomas, S.; Robbins, M.; Aribi, A.; Salhotra, A.; et al. ALL-440: Promising Safety and Efficacy Results from an Ongoing Phase 1/2 Study of Pembrolizumab in Combination with Blinatumomab in Patients (pts) with Relapsed or Refractory (R/R) Acute Lymphoblastic Leukemia (ALL). *Clin. Lymphoma Myeloma Leuk.* **2021**, *21*, S276, [https://doi.org/10.1016/s2152-2650\(21\)01666-9](https://doi.org/10.1016/s2152-2650(21)01666-9).
13. Webster, J.; Luskin, M.R.; Prince, G.T.; DeZern, A.E.; DeAngelo, D.J.; Levis, M.J.; Blackford, A.; Sharon, E.; Streicher, H.; Luznik, L.; et al. Blinatumomab in Combination with Immune Checkpoint Inhibitors of PD-1 and CTLA-4 in Adult Patients with Relapsed/Refractory (R/R) CD19 Positive B-Cell Acute Lymphoblastic Leukemia (ALL): Preliminary Results of a Phase I Study. *Blood* **2018**, *132*, 557. <https://doi.org/10.1182/blood-2018-99-111845>.
14. Annesley, C.; Summers, C.; Pulsipher, M.A.; Skiles, J.L.; Li, A.M.; Vatsayan, A.; Lindgren, C.; Mgebroff, S.; Wilson, A.; Huang, W.; et al. SCRI-CAR19x22v2 T Cell Product Demonstrates Bispecific Activity in B-ALL. *Blood* **2021**, *138*, 470–470, <https://doi.org/10.1182/blood-2021-148881>.

15. Shalabi, H.; Qin, H.; Su, A.; Yates, B.; Wolters, P.L.; Steinberg, S.M.; Ligon, J.A.; Silbert, S.; Dédé, K.; Benzaoui, M.; et al. CD19/22 CAR T cells in children and young adults with B-ALL: phase 1 results and development of a novel bicistronic CAR. *Blood* **2022**, *140*, 451–463, <https://doi.org/10.1182/blood.2022015795>.
16. Cordoba, S.; Onuoha, S.; Thomas, S.; Pignataro, D.S.; Hough, R.; Ghorashian, S.; Vora, A.; Bonney, D.; Veys, P.; Rao, K.; et al. CAR T cells with dual targeting of CD19 and CD22 in pediatric and young adult patients with relapsed or refractory B cell acute lymphoblastic leukemia: a phase 1 trial. *Nat. Med.* **2021**, *27*, 1797–1805, <https://doi.org/10.1038/s41591-021-01497-1>.
17. Frey, N.V.; Gill, S.; Hwang, W.-T.; Luger, S.M.; Martin, M.E.; McCurdy, S.R.; Loren, A.W.; Pratz, K.W.; Perl, A.E.; Barber-Rotenberg, J.; et al. CART22-65s Co-Administered with huCART19 in Adult Patients with Relapsed or Refractory ALL. *Blood* **2021**, *138*, 469–469, <https://doi.org/10.1182/blood-2021-153955>.
18. Yang, J.; He, J.; Zhang, X.; Li, J.; Wang, Z.; Zhang, Y.; Qiu, L.; Wu, Q.; Sun, Z.; Ye, X.; et al. Next-Day Manufacture of a Novel Anti-CD19 CAR-T Therapy for B-Cell Acute Lymphoblastic Leukemia: First-in-Human Clinical Study. *Blood Cancer J.* **2022**, *12*, 104. <https://doi.org/10.1038/s41408-022-00694-6>.
19. Benjamin, R.; Jain, N.; Maus, M.V.; Boissel, N.; Graham, C.; Jozwik, A.; Yallop, D.; Konopleva, M.; Frigault, M.J.; Teshima, T.; et al. UCART19, a First-in-Class Allogeneic Anti-CD19 Chimeric Antigen Receptor T-Cell Therapy for Adults with Relapsed or Refractory B-Cell Acute Lymphoblastic Leukaemia (CALM): A Phase 1, Dose-Escalation Trial. *Lancet Haematol.* **2022**, *9*, e833–e843. [https://doi.org/10.1016/S2352-3026\(22\)00245-9](https://doi.org/10.1016/S2352-3026(22)00245-9).
20. Jain, N.; Roboz, G.J.; Konopleva, M.; Liu, H.; Jabbour, E.; Poirot, P.C.; Schiffer-Manniou, C.; Gouble, A.; Haider, A.; Zernovak, O.; et al. Preliminary Results of Balli-01: A Phase I Study of UCART22 (allogeneic engineered T-cells expressing anti-CD22 Chimeric Antigen Receptor) in Adult Patients with Relapsed or Refractory (R/R) CD22+ B-Cell Acute Lymphoblastic Leukemia (B-ALL). *Blood* **2020**, *136*, 7–8, <https://doi.org/10.1182/blood-2020-138594>.
21. Shah, B.D.; Jacobson, C.; Solomon, S.R.; Jain, N.; Johnson, M.C.; Vainorius, M.; Yu, L.; Heery, C.R.; List, A.F.; He, F.; et al. Allogeneic CAR-T PBCAR0191 with Intensified Lymphodepletion Is Highly Active in Patients with Relapsed/Refractory B-Cell Malignancies. *Blood* **2021**, *138*, 302–302, <https://doi.org/10.1182/blood-2021-150609>.
22. Magnani, C.F.; Gaipa, G.; Lussana, F.; Belotti, D.; Gritti, G.; Napolitano, S.; Matera, G.; Cabiati, B.; Buracchi, C.; Borleri, G.; et al. Sleeping Beauty-Engineered CAR T Cells Achieve Antileukemic Activity without Severe Toxicities. *J. Clin. Investig.* **2020**, *130*, 6021–6033. <https://doi.org/10.1172/JCI138473>.
23. Lussana, F.; Magnani, C.F.; Gaipa, G.; Galimberti, S.; Gritti, G.; Belotti, D.; Napolitano, S.; Buracchi, C.; Borleri, G.M.; Rambaldi, B.; et al. Final Results of Phase I/II Study of Donor-Derived CAR T Cells Engineered with Sleeping Beauty in Pediatric and Adult Patients with B-Cell Acute Lymphoblastic Leukemia Relapsed Post-HSCT. *Blood* **2022**, *140*, 4568–4569. <https://doi.org/10.1182/blood-2022-165448>.
